# Supplementary material
Source: PubMed Central journal article supplement (PMC7964473)
Supplement: 3312_materials.pdf [file 3312_materials.pdf]

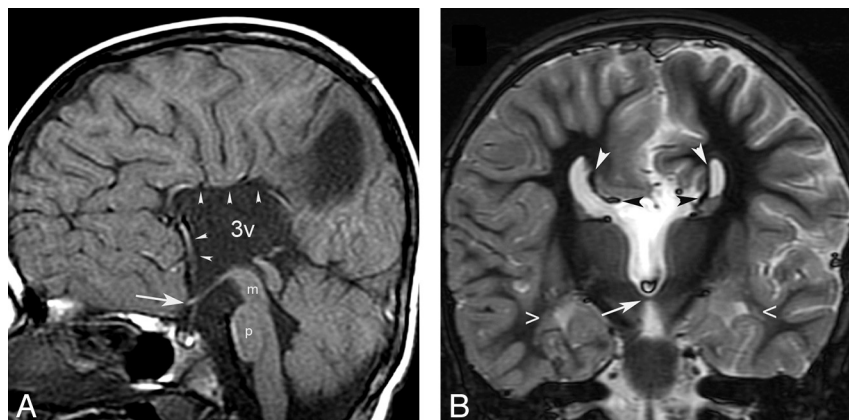

**ON-LINE FIGURE 1.** A 13-year-old boy with bilateral PNH. *A*, Sagittal T1 spin-echo-weighted image shows an enlarged third ventricle (3v) without commissural structures along either its roof or anterior wall (white arrowheads). Only the optic chiasm (white arrow) is seen in the floor of the third ventricle. Small midbrain (m) and pons (p) are also observed. *B*, Coronal T2 FSE through the anterior aspect of third ventricle shows bilateral PNH in the margins of temporal horns (open arrowheads). Agenesis of the corpus callosum with very small Probst bundles is seen along the medial aspect of frontal horn (white arrowheads); fornices are seen at their infero-medial margins (black arrowheads). A very tiny anterior commissure could be present at the anterior wall of the third ventricle (white arrow).

**On-line Table 1: Locations of PNH**

| Location        | No. | %    |
|-----------------|-----|------|
| Frontal horns   | 116 | 58   |
| Bodies          | 120 | 60   |
| Trigones        | 146 | 73   |
| Occipital horns | 90  | 45   |
| Temporal horns  | 93  | 46.5 |

**On-line Table 2: Location of isolated PNH**

| Location        | No. | %   |
|-----------------|-----|-----|
| Frontal horns   | 15  | 7.5 |
| Bodies          | 9   | 4.5 |
| Trigones        | 13  | 6.5 |
| Occipital horns | 1   | 0.5 |
| Temporal horns  | 3   | 1.5 |

**On-line Table 3: Cortical anomalies associated with PNH**

|            | Proliferation |      | Migration |      | Organization |      | Global (P+M+O) |      | Acquired Injury |     |
|------------|---------------|------|-----------|------|--------------|------|----------------|------|-----------------|-----|
|            | No.           | %    | No.       | %    | No.          | %    | No.            | %    | No.             | %   |
| Group 1    | 10            | 15.9 | 9         | 14.3 | 6            | 9.5  | 25             | 39.7 | 1               | 1.6 |
| Group 2    | 4             | 10.3 | 5         | 12.8 | 2            | 5.1  | 11             | 28.2 | 1               | 2.6 |
| Group 3    | 2             | 2.0  | 23        | 23.5 | 5            | 5.1  | 30             | 30.6 | 2               | 2.0 |
| Unilateral | 4             | 9.5  | 12        | 28.6 | 6            | 14.3 | 22             | 52.4 | 0               | 0.0 |
| Bilateral  | 11            | 7.0  | 25        | 15.8 | 7            | 4.4  | 43             | 27.2 | 4               | 2.5 |
| Diffuse    | 0             | 0.0  | 8         | 25.0 | 1            | 3.1  | 9              | 28.1 | 0               | 0.0 |
| Anterior   | 2             | 4.7  | 3         | 7.0  | 1            | 2.3  | 6              | 14.0 | 1               | 2.3 |
| Posterior  | 10            | 17.2 | 12        | 20.7 | 8            | 13.8 | 30             | 51.7 | 1               | 1.7 |
| Global     | 16            | 8.0  | 37        | 18.5 | 13           | 6.5  | 66             | 33.0 | 4               | 2.0 |

**Note:**—P+M+O indicates Proliferation + Migration + Organization.

**On-line Table 4: WM volume and myelination**

|            | WM Volume |         | Myelination |         | C.A. |
|------------|-----------|---------|-------------|---------|------|
|            | Normal    | Reduced | Normal      | Delayed |      |
| Group 1    | 31.7%     | 68.3%   | 82.5%       | 14.3%   | 3.2% |
| Group 2    | 30.8%     | 69.2%   | 82.1%       | 15.4%   | 2.6% |
| Group 3    | 30.6%     | 69.4%   | 91.8%       | 8.2%    | 0.0% |
| Unilateral | 26.2%     | 73.8%   | 83.3%       | 11.9%   | 4.8% |
| Bilateral  | 32.3%     | 67.7%   | 88.0%       | 11.4%   | 0.6% |
| Diffuse    | 15.6%     | 84.4%   | 84.4%       | 15.6%   | 0.0% |
| Anterior   | 48.8%     | 51.2%   | 88.4%       | 11.6%   | 0.0% |
| Posterior  | 24.1%     | 75.9%   | 81.0%       | 15.5%   | 3.4% |

**Note:**—C.A. indicates could not assess.

**On-line Table 5: Forebrain commissures in patients with PNH**

|            | Corpus Callosum |          |             |             |      | Anterior Commissure |             |       |        |       | Hippocampal Commissure |        |       |
|------------|-----------------|----------|-------------|-------------|------|---------------------|-------------|-------|--------|-------|------------------------|--------|-------|
|            | Normal          | Agenesis | Hypogenesis | Hypoplastic | C.A. | Normal              | Hypoplastic | Thick | Absent | C.A.  | Present                | Absent | C.A.  |
| Group 1    | 36.5%           | 11.1%    | 28.6%       | 22.2%       | 1.6% | 46.0%               | 23.8%       | 0.0%  | 6.3%   | 23.8% | 71.4%                  | 12.7%  | 15.9% |
| Group 2    | 30.8%           | 5.1%     | 43.6%       | 17.9%       | 2.6% | 64.1%               | 10.3%       | 5.1%  | 2.6%   | 17.9% | 71.8%                  | 7.7%   | 20.5% |
| Group 3    | 35.7%           | 8.2%     | 22.4%       | 30.6%       | 3.1% | 44.9%               | 25.5%       | 3.1%  | 6.1%   | 20.4% | 68.4%                  | 17.3%  | 14.3% |
| Unilateral | 31.0%           | 11.9%    | 31.0%       | 23.8%       | 2.4% | 50.0%               | 26.2%       | 2.4%  | 2.4%   | 19.0% | 69.0%                  | 11.9%  | 19.0% |
| Bilateral  | 36.1%           | 7.6%     | 27.8%       | 25.9%       | 2.5% | 48.7%               | 20.9%       | 2.5%  | 6.3%   | 20.9% | 70.3%                  | 14.6%  | 15.2% |
| Diffuse    | 18.8%           | 6.3%     | 28.1%       | 43.8%       | 3.1% | 56.3%               | 18.8%       | 6.3%  | 0.0%   | 18.8% | 59.4%                  | 18.8%  | 21.9% |
| Anterior   | 48.8%           | 4.7%     | 23.3%       | 23.3%       | 0.0% | 55.8%               | 23.3%       | 4.7%  | 7.0%   | 9.3%  | 72.1%                  | 9.3%   | 18.6% |
| Posterior  | 31.0%           | 12.1%    | 32.8%       | 24.1%       | 0.0% | 31.0%               | 31.0%       | 0.0%  | 6.9%   | 31.0% | 67.2%                  | 17.2%  | 15.5% |

**Note:**—C.A. indicates could not assess.

**On-line Table 6: Posterior fossa structures in patients with PNH**

|            | Vermis |          |      | Cerebellar Hemispheres |          |      | Brain Stem |          |      | MCM      |
|------------|--------|----------|------|------------------------|----------|------|------------|----------|------|----------|
|            | Normal | Abnormal | C.A. | Normal                 | Abnormal | C.A. | Normal     | Abnormal | C.A. | Presence |
| Group 1    | 73.0%  | 27.0%    | 0.0% | 88.9%                  | 11.1%    | 0.0% | 71.4%      | 27.0%    | 1.6% | 1.6%     |
| Group 2    | 76.9%  | 20.5%    | 2.6% | 92.3%                  | 5.1%     | 2.6% | 82.1%      | 15.4%    | 2.6% | 5.1%     |
| Group 3    | 67.3%  | 31.6%    | 1.0% | 77.6%                  | 21.4%    | 1.0% | 82.7%      | 16.3%    | 1.0% | 21.4%    |
| Unilateral | 71.4%  | 26.2%    | 2.4% | 83.3%                  | 14.3%    | 2.4% | 73.8%      | 23.8%    | 2.4% | 2.4%     |
| Bilateral  | 70.9%  | 28.5%    | 0.6% | 84.2%                  | 15.2%    | 0.6% | 80.4%      | 18.4%    | 1.3% | 14.6%    |
| Diffuse    | 62.5%  | 37.5%    | 0.0% | 81.3%                  | 18.8%    | 0.0% | 87.5%      | 12.5%    | 0.0% | 31.3%    |
| Anterior   | 86.0%  | 14.0%    | 0.0% | 93.0%                  | 7.0%     | 0.0% | 90.7%      | 9.3%     | 0.0% | 0.0%     |
| Posterior  | 60.3%  | 37.9%    | 1.7% | 75.9%                  | 24.1%    | 0.0% | 69.0%      | 31.0%    | 0.0% | 5.2%     |

**Note:**—C.A. indicates could not assess; MCM, megacisterna magna.

**On-line Table 7: Basal ganglia/thalami/hippocampi anomalies in PNH**

|            | Basal Ganglia/Thalami |          |      | Hippocampi |          |       |
|------------|-----------------------|----------|------|------------|----------|-------|
|            | Normal                | Abnormal | C.A. | Normal     | Abnormal | C.A.  |
| Group 1    | 84.1%                 | 14.3%    | 1.6% | 63.5%      | 14.3%    | 22.2% |
| Group 2    | 87.2%                 | 7.7%     | 5.1% | 66.7%      | 17.9%    | 15.4% |
| Group 3    | 85.7%                 | 13.3%    | 1.0% | 58.2%      | 19.4%    | 22.4% |
| Unilateral | 78.6%                 | 19.0%    | 2.4% | 61.9%      | 9.5%     | 28.6% |
| Bilateral  | 87.3%                 | 10.8%    | 1.9% | 61.4%      | 19.6%    | 19.0% |
| Diffuse    | 87.5%                 | 9.4%     | 3.1% | 59.4%      | 15.6%    | 25.0% |
| Anterior   | 86.0%                 | 14.0%    | 0.0% | 62.8%      | 11.6%    | 25.6% |
| Posterior  | 93.1%                 | 5.2%     | 1.7% | 56.9%      | 20.7%    | 22.4% |

**Note:**—C.A. indicates could not assess.
